# Supplementary material for: MiR-340 Is a Biomarker for Selecting Treatment Between Chemotherapy and Allogeneic Transplantation in Acute Myeloid Leukemia
Source: Front Oncol. 2019 Oct 11;9:1058. doi: 10.3389/fonc.2019.01058 (PMC6798954; doi:10.3389/fonc.2019.01058)
Supplement: Supplementary Table 1 — Clinical data. [file Table_1.XLSX]

## Sheet: chemotherapy
TCGA Patient ID	Mir-340 expression	EFS (months)	EFS status	OS (months)	OS status
2868	low	4.5	1	4.5	1
2987	low	5.3	1	6.3	1
2863	low	1.2	1	1.2	1
2820	low	0.3	1	0.3	1
2943	low	4.2	1	4.2	1
2853	low	3.1	1	3.1	1
2832	low	11.4	1	11.8	1
2944	low	2.4	1	2.4	1
2977	low	0.8	1	0.8	1
2972	low	1.5	1	1.5	1
2931	low	0.1	1	0.1	1
2910	low	0	1	0	1
2842	low	0.3	1	0.3	1
2836	low	17	1	17	1
2942	low	43.5	0	43.5	0
2929	low	4.6	1	4.6	1
2816	low	5.1	1	7.5	1
2843	low	3.7	1	6.3	1
2859	low	8	1	10.2	1
2971	low	17	1	25.8	1
2861	low	0.6	1	0.6	1
3006	low	12	1	15.5	1
2837	low	0.7	1	0.7	1
2957	low	20.1	0	20.1	0
2988	low	0.8	1	0.8	1
2973	low	12	1	20.5	1
2851	low	5.9	1	7.7	1
2802	low	8.7	1	12	1
2985	low	9.2	1	9.2	1
2824	low	0.3	1	0.3	1
2928	low	4	1	4	1
2922	low	0.1	1	0.1	1
2927	low	2.4	1	2.4	1
2937	low	4.6	1	8	1
2899	low	17.3	1	22.3	1
2830	low	8.1	1	8.1	1
2956	low	3.2	1	5.7	1
2959	low	13.4	1	15.4	1
2869	low	15.6	1	27.1	0
2900	low	4.9	1	6.3	1
2838	low	10.3	1	12.4	1
2903	low	0.4	1	0.4	1
2834	low	7.7	1	7.7	1
2818	low	6.9	1	10.2	1
2895	low	5.7	1	5.7	1
2923	high	0.6	1	0.6	1
2996	high	73	0	73	0
2833	high	9.3	1	15.8	1
2835	high	77.3	0	77.3	0
2914	high	48.3	0	48.3	0
2879	high	4.3	1	31.9	0
2915	high	0.5	1	0.5	1
2826	high	12.1	1	24.1	1
2947	high	25.9	0	25.9	0
2882	high	11	1	11	1
2925	high	7.8	1	7.9	1
2828	high	99.9	0	99.9	0
2935	high	1.6	1	1.6	1
2933	high	4.6	1	4.6	1
2810	high	1.3	1	1.3	1
2813	high	1.3	1	1.3	1
2873	high	32.7	0	32.7	0
2865	high	2.3	1	2.3	1
2932	high	42.1	0	42.1	0
2805	high	11.6	1	18.5	1
2964	high	59.5	0	59.5	0
2819	high	95.6	0	95.6	0
2866	high	4.5	1	5.5	1
2984	high	71.3	0	71.3	0
2867	high	5.2	1	5.2	1
2938	high	7.2	1	9.9	1
2807	high	4.9	1	4.9	1
2919	high	26.8	0	26.8	0
2890	high	0.5	1	0.5	1
2856	high	5.3	1	5.3	1
2844	high	3.9	1	3.9	1
2908	high	1.4	1	1.4	1
2885	high	4.8	1	7	1
2886	high	29.4	0	29.4	0
2954	high	68.3	0	68.3	0
2875	high	27.7	0	27.7	0
2888	high	33.5	0	33.5	0
2950	high	40.3	0	40.3	0
2811	high	8.2	1	8.2	1
2952	high	1.9	1	1.9	1
2948	high	18.1	1	18.1	1
3002	high	26.2	1	46.8	1
2870	high	4.5	1	4.5	1
2858	high	18.2	1	19.2	1
2941	high	0.2	1	0.2	1

## Sheet: allo-HSCT
TCGA Patient ID	Mir-340 expression	EFS (month)	EFS status	OS (month)	OS status
2916	low	45.3	0	45.3	0
2963	low	53.9	1	53.9	1
2986	low	6.6	1	6.6	1
2989	low	8.9	1	11.9	1
2839	low	10.2	1	16.3	1
2904	low	17.1	1	17.1	1
2857	low	6.5	1	10	1
2976	low	7.7	1	30	1
2812	low	7.3	1	11.5	1
2969	low	16.6	1	62.3	0
2883	low	47.2	0	47.2	0
2814	low	22.2	1	26.3	1
2871	low	13.9	1	22.6	0
2966	low	8.6	1	28.4	1
2855	low	6.7	1	7.2	1
2965	low	9.9	1	11.3	1
2945	low	1.9	1	7.8	1
2995	low	69.7	1	73.6	0
2913	low	6.1	1	52.6	0
2970	low	8.3	1	10.7	1
2860	low	12	1	13.6	1
2993	low	11.1	1	24.6	1
2821	low	27.4	1	27.4	1
2924	low	26	0	26	0
2975	low	8.5	1	34	1
2911	low	3.7	1	61.2	0
2921	low	6.3	1	8.1	1
2912	low	8.4	1	8.4	1
2848	low	13.4	1	14.5	1
2936	low	13.8	0	13.8	0
2981	low	44.4	0	44.4	0
2992	low	11.9	1	56.3	1
2934	low	2.7	1	6.6	0
2949	low	32.6	0	32.6	0
2822	low	32.3	1	32.3	1
2893	low	6.6	1	6.6	1
2918	high	6	1	7.4	1
2815	high	14.2	1	26.3	1
2878	high	12.2	1	12.2	1
2990	high	34.1	1	42.1	0
2917	high	39	1	57.3	0
2806	high	16.1	1	30.6	1
3000	high	67.7	0	67.7	0
2983	high	3.8	1	11.2	1
3011	high	81.9	0	81.9	0
2884	high	13.8	1	24.8	1
2877	high	41.4	0	41.4	0
2946	high	20.8	1	24.4	0
2898	high	36.1	0	36.1	0
2891	high	14.9	1	21.5	1
2817	high	9.3	1	9.3	1
2887	high	4.9	1	17.4	1
2978	high	35.6	1	44.8	0
2881	high	8.8	1	29.7	0
2930	high	4.8	1	7.1	1
3009	high	7.7	1	19	1
2955	high	9.6	1	16.4	1
2849	high	95.5	0	95.5	0
2939	high	36.9	0	36.9	0
2876	high	59	0	59	0
2808	high	10	1	118.1	0
2892	high	9.8	1	59.3	0
2901	high	3	1	10.5	0
2909	high	20.6	1	26.1	0
2874	high	35.2	0	35.2	0
2920	high	5.2	1	11.8	1
2889	high	28.4	1	34.3	0
2846	high	10.8	1	45.8	1
2847	high	19.3	1	52.7	1
3008	high	7.7	1	27	1
2940	high	14.6	1	55.4	1
2880	high	9.8	1	20.5	1
